# Supplementary material for: Optical constants manipulation of formamidinium lead iodide perovskites: ellipsometric and spectroscopic twigging
Source: Royal Society of Chemistry journal article supplement (doi:10.1039/d4ya00339j), 2024-01-01
Supplement: d4ya00339j1.pdf [file d4ya00339j1.pdf]

## Optical constants manipulation of formamidinium lead iodide perovskites: Ellipsometric and spectroscopic twiggung

Mohd Taukeer Khan,<sup>a</sup> Muhammed P. U. Haris,<sup>b</sup> Baraa Alhourri,<sup>a</sup> Samrana Kazim,<sup>b,c,d</sup> Shahzada Ahmad<sup>b,d</sup>

<sup>a</sup>Department of Physics, Faculty of Science, Islamic University of Madinah, Prince Naifbin Abdulaziz, Al Jamiah, Madinah 42351, Kingdom of Saudi Arabia

<sup>b</sup>BCMaterials, Basque Center for Materials, Applications, and Nanostructures, UPV/EHU Science Park, 48940, Leioa, Spain

Email: shahzada.ahmad@bcmaterials.net

<sup>c</sup>Materials Physics Center, CSIC-UPV/EHU, Paseo Manuel de Lardizabal 5, 20018, Donostia - San Sebastian, Spain

<sup>d</sup>IKERBASQUE, Basque Foundation for Science, Bilbao, 48009, Spain

### S1. Fitting of Spectroscopic Ellipsometer data

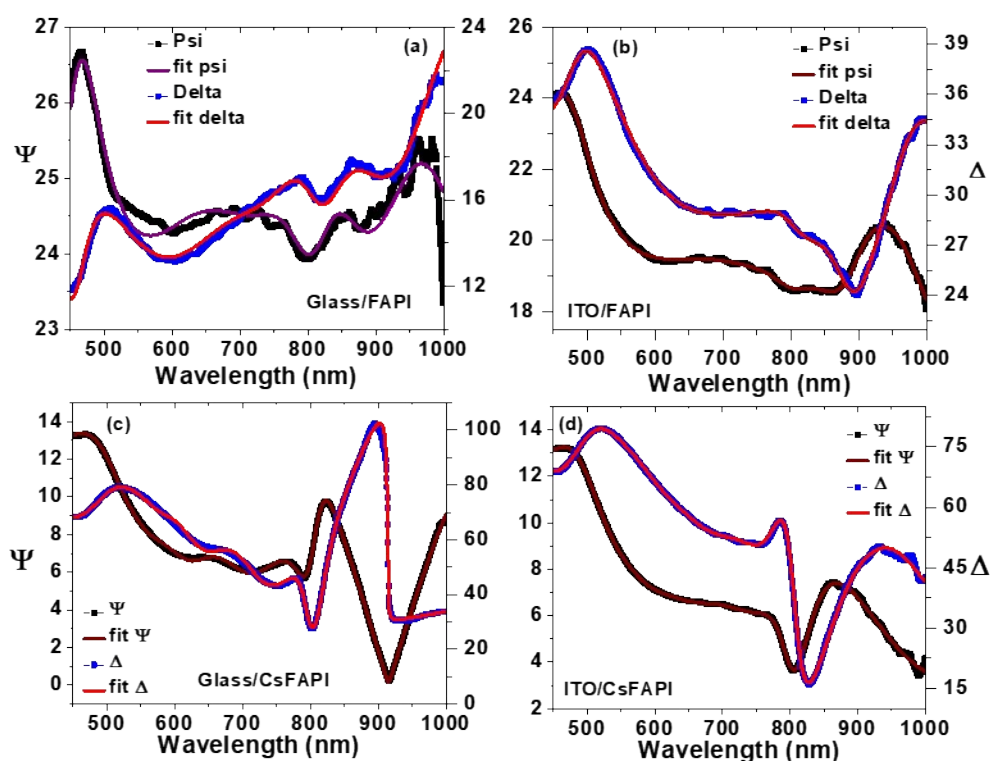

**Figure S1.** The measured amplitude ratio ( $\psi$ ) and phase difference ( $\Delta$ ) of the FAPI and CsFAPI thin films on glass and ITO.

**Table S1.** Tauc-Lorentz fit parameters for FAPI and CsFAPI thin films on glass and ITO.

| Sample              | Glass/FAPI | ITO/FAPI | Glass/CsFAPI | ITO/ CsFAPI |
|---------------------|------------|----------|--------------|-------------|
| r (nm)              | 15         | 23       | 21           | 15          |
| Void (%)            | 20         | 23       | 12           | 9           |
| $\epsilon_{\infty}$ | 1.25       | 1.24     | 1.10         | 1.01        |
| $A_1$               | 3.43       | 30.55    | 24.53        | 6.16        |
| $E_1$               | 1.55       | 1.45     | 1.57         | 1.58        |
| $C_1$               | 0.19       | 0.44     | 0.13         | 0.13        |
| $A_2$               | 44.45      | 52.101   | 7.60         | 6.52        |
| $E_2$               | 2.18       | 2.18     | 2.46         | 2.45        |
| $C_2$               | 4.35       | 3.70     | 0.49         | 0.54        |
| $A_3$               | 0.83       | 1.00     | 6.50         | 8.26        |
| $E_3$               | 2.70       | 2.45     | 3.31         | 3.18        |
| $C_3$               | 0.41       | 0.49     | 3.89         | 0.61        |
| $\chi^2$            | 0.18       | 0.03     | 0.10         | 0.03        |

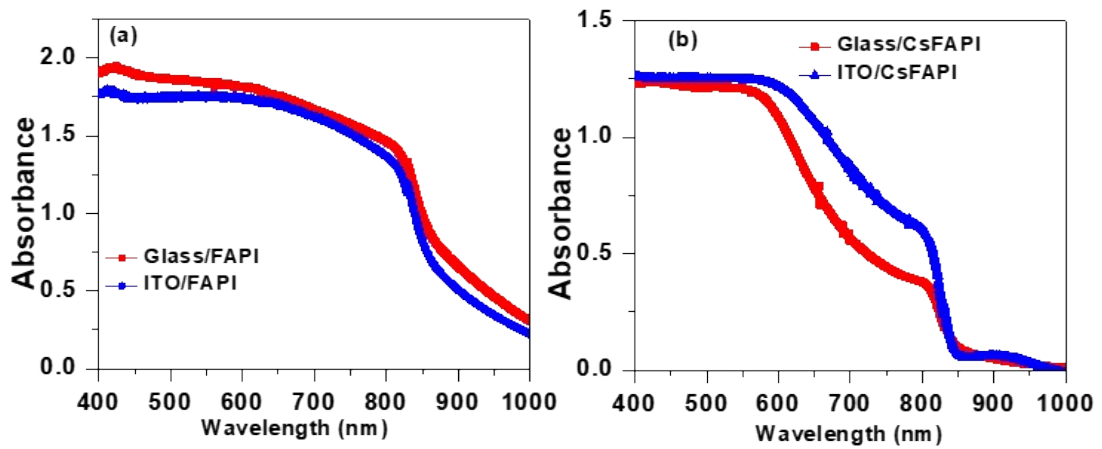

**Figure S2.** The absorption spectra of (a) FAPbI<sub>3</sub> and (b) CsFAPbI<sub>3</sub> thin films.

**Table S2:** Energy bandgap of FAPI and CsFAPI thin films on glass and ITO.

| Sample           | $E_g$   |
|------------------|---------|
| Glass/ FAPI      | 1.49 Ev |
| Glass/ITO/FAPI   | 1.50 eV |
| Glass/CsFAPI     | 1.59 eV |
| Glass/ITO/CsFAPI | 1.58 eV |

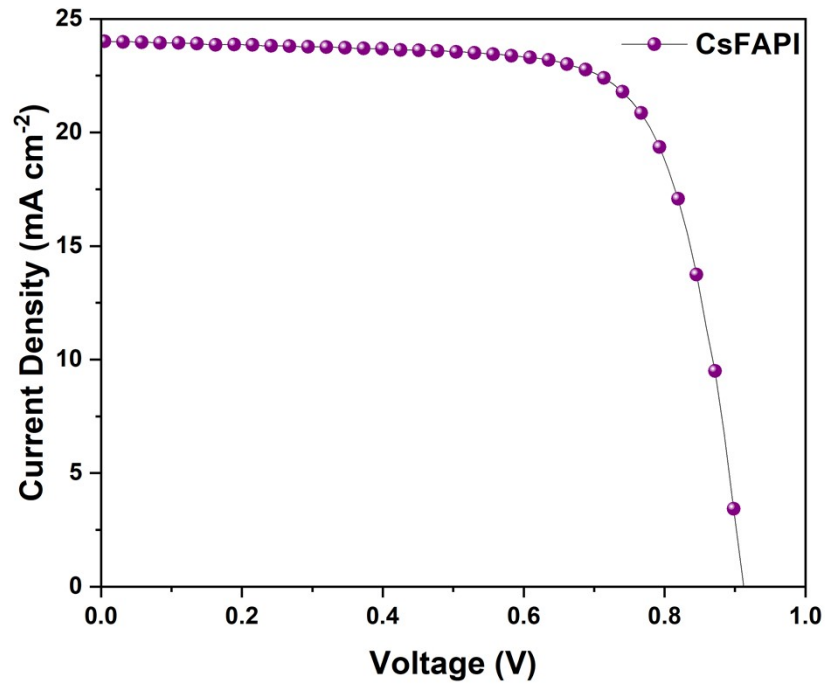

**Figure S3.** *J-V* characteristics under illumination of a typical CsFAPbI<sub>3</sub>-based perovskites solar cell.

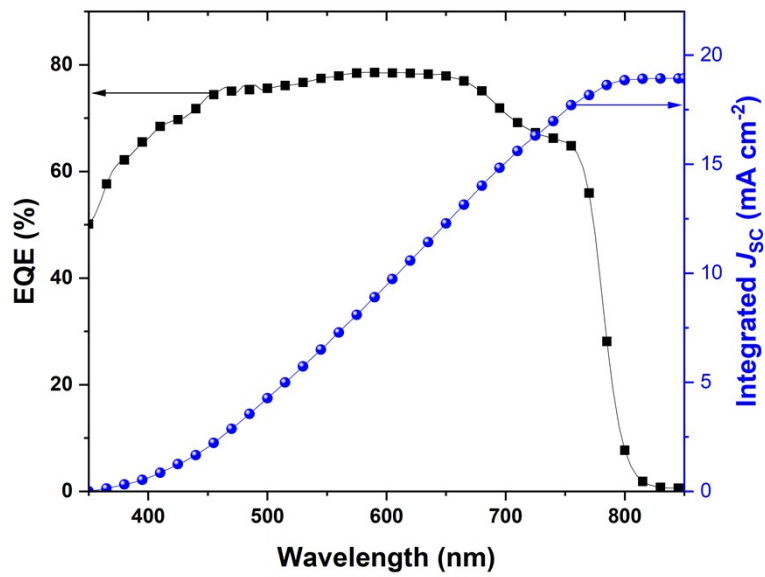

**Figure S4.** EQE characteristics of a typical CsFAPbI<sub>3</sub>-based perovskites solar cell.
